# Supplementary material
Source: Springer Nature journal article supplement (https://www.springermedizin.de/resource/supplementary/12958_2012_1008_MOESM4_ESM.pdf/9566562)

**ST****Follicular Phase****Periovulatory Phase****Lutheal Phase****proMMP9**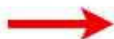**MMP9**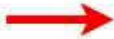**proMMP-2**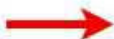**MPP-2**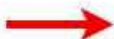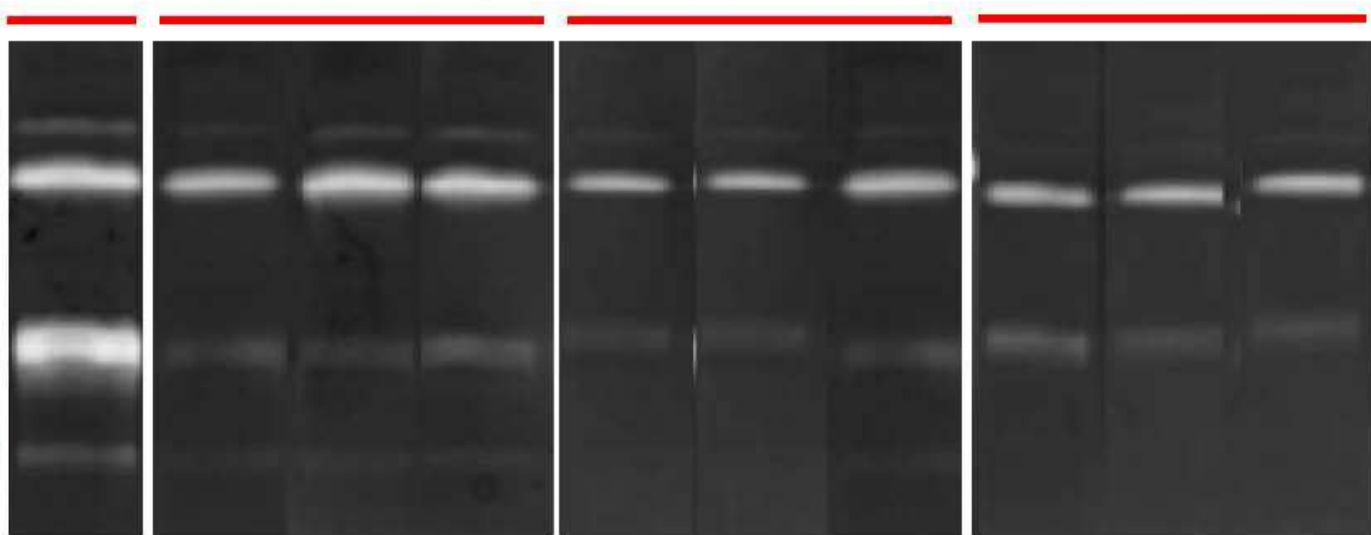

Supplement: MOESM4 [file 9566562]
